# Supplementary material
Source: publisher site journal article supplement (https://zse.pensoft.net/article/57968/download/suppl/33/)
Supplement: Supplementary file 1

**Supplementary Table S3.** Body size data for the *Microhyla – Glyphoglossus* assemblage members (from Gorin et al. 2020, with modifications). For both sexes of each species maximal body size data is given. Question mark denotes “no data”. For voucher IDs of specimens see Gorin et al. (2020).

| **№** | **Species** | **SVL max** | | **Reference** |
| --- | --- | --- | --- | --- |
| **♂** | **♀** |
| **1** | *Microhyla achatina* | 23.0 | 26.1 | *Gorin et al., 2020* |
| **2** | *Microhyla annamensis* | 19.8 | 22.6 | *Gorin et al., 2020* |
| **3** | *Microhyla annectens* | 15.6 | 18.4 | *Gorin et al., 2020* |
| **4** | *Microhyla arboricola* | 15.0 | 17.0 | *Gorin et al., 2020* |
| **5** | *Microhyla aurantiventris* | 27.0 | 30.5 | *Gorin et al., 2020* |
| **6** | *Microhyla beilunensis* | 23.7 | 28.3 | *Gorin et al., 2020* |
| **7** | *Microhyla berdmorei* | 32.5 | 45.6 | *Gorin et al., 2020* |
| **8** | *Microhyla borneensis* | 13.8 | 17.3 | *Gorin et al., 2020* |
| **9** | *Microhyla butleri* | 25.0 | 26.0 | *Gorin et al., 2020* |
| **10** | *Microhyla chakrapanii* | 22.0 | 27.4 | *Gorin et al., 2020;*  *Harikrishnan & Vasudevan, 2018* |
| **11** | *Microhyla darevskii* | 32.6 | ? | *Gorin et al., 2020* |
| **12** | *Microhyla darreli* | 15.1 | ? | *Gorin et al., 2020* |
| **13** | *Microhyla eos* | 21.5 | 27.8 | *Gorin et al., 2020* |
| **14** | *Microhyla fanjingshanensis* | 22.7 | 23.0 | *Gorin et al., 2020* |
| **15** | *Microhyla fissipes* | 27.5 | 28.0 | *Gorin et al., 2020* |
| **16** | *Microhyla fodiens* | 29.1 | 30.0 | *Gorin et al., 2020* |
| **17** | *Microhyla fusca* | 23.0 | ? | *Poyarkov et al., 2020a* |
| **18** | *Microhyla gadjahmadai* | 21.3 | 25.5 | *Gorin et al., 2020* |
| **19** | *Microhyla heymonsi* | 22.0 | 26.5 | *Gorin et al., 2020* |
| **20** | *Microhyla hongiaoensis* | 14.7 | 18.6 | *Gorin et al., 2020* |
| **21** | *Microhyla irrawaddy* | 17.1 | 20.9 | *Gorin et al., 2020* |
| **22** | *Microhyla karunaratnei* | 19.1 | 21.0 | *Gorin et al., 2020* |
| **23** | *Microhyla kodial* | 17.4 | 20.4 | *Gorin et al., 2020* |
| **24** | *Microhyla laterite* | 16.6 | 18.4 | *Gorin et al., 2020* |
| **25** | *Microhyla malang* | 22.2 | 23.4 | *Gorin et al., 2020* |
| **26** | *Microhyla mantheyi* | 29.2 | 24.1 | *Gorin et al., 2020* |
| **27** | *Microhyla marmorata* | 21.5 | 23.2 | *Gorin et al., 2020* |
| **28** | *Microhyla mihintalei* | 27.3 | 24.4 | *Gorin et al., 2020* |
| **29** | *Microhyla minuta* | 15.9 | 17.2 | *Gorin et al., 2020* |
| **30** | *Microhyla mixtura* | 23.7 | 26.6 | *Gorin et al., 2020* |
| **31** | *Microhyla mukhlesuri* | 21.0 | 18.4 | *Gorin et al., 2020* |
| **32** | *Microhyla mymensinghensis* | 17.6 | 21.3 | *Gorin et al., 2020* |
| **33** | *Microhyla nanapollexa* | 13.5 | 16.6 | *Gorin et al., 2020* |
| **34** | *Microhyla nepenthicola* | 12.8 | 18.8 | *Gorin et al., 2020* |
| **35** | *Microhyla nilphamariensis* | 17.4 | 18.3 | *Gorin et al., 2020* |
| **36** | *Microhyla okinavensis* | 27.2 | 28.6 | *Gorin et al., 2020* |
| **37** | *Microhyla orientalis* | 17.4 | 19.2 | *Gorin et al., 2020* |
| **38** | *Microhyla ornata* | 24.9 | 26.2 | *Gorin et al., 2020* |
| **39** | *Microhyla palmipes* | 16.0 | 21.8 | *Gorin et al., 2020;*  *Garg et al., 2019* |
| **40** | *Microhyla perparva* | 11.9 | 14.5 | *Gorin et al., 2020* |
| **41** | *Microhyla petrigena* | 16.2 | 17.8 | *Gorin et al., 2020* |
| **42** | *Microhyla picta* | 30.1 | 33.4 | *Gorin et al., 2020* |
| **43** | *Microhyla pineticola* | 19.5 | 23.0 | *Gorin et al., 2020* |
| **44** | *Microhyla pulchella* | 21.6 | 25.8 | *Gorin et al., 2020* |
| **45** | *Microhyla pulchra* | 32.0 | 36.5 | *Gorin et al., 2020* |
| **46** | *Microhyla rubra* | 27.5 | 29.5 | *Gorin et al., 2020* |
| **47** | *Microhyla sholigari* | 16.2 | 19.2 | *Gorin et al., 2020* |
| **48** | *Microhyla superciliaris* | 12.7 | 12.0 | *Gorin et al., 2020* |
| **49** | *Microhyla taraiensis* | 20.3 | 24.9 | *Gorin et al., 2020* |
| **50** | *Microhyla tetrix* | 13.7 | 17.6 | *Poyarkov et al., 2020b* |
| **51** | *Microhyla zeylanica* | 18.3 | 20.0 | *Gorin et al., 2020* |
| **52** | *Microhyla* sp. 1 | 13.3 | 11.8 | *Gorin et al., 2020* |
| **53** | *Microhyla* sp. 2 | 28.2 | 30.2 | *Gorin et al., 2020* |
| **54** | *Microhyla* sp. 3 | 17.1 | 20.9 | *Gorin et al., 2020* |
| **55** | *Glyphoglossus capsus* | 36.0 | 36.0 | *Gorin et al., 2020* |
| **56** | *Glyphoglossus guttulatus* | 47.0 | 54.0 | *Gorin et al., 2020* |
| **57** | *Glyphoglossus minutus* | 30.9 | 32.7 | *Gorin et al., 2020* |
| **58** | *Glyphoglossus molossus* | 94.9 | 81.9 | *Gorin et al., 2020* |
| **59** | *Glyphoglossus yunnanensis* | 35.5 | 48.8 | *Gorin et al., 2020* |
| **60** | *Kaloula baleata* | 60.0 | 65.0 | *Gorin et al., 2020* |
